# Supplementary material for: Understanding the use of email consultation in primary care using a retrospective observational study with data of Dutch electronic health records
Source: PubMed Central journal article supplement — BMJ Open. 2018 Jan 21;8(1):e019233. doi: 10.1136/bmjopen-2017-019233 (PMC5781222; doi:10.1136/bmjopen-2017-019233), 2018-01-21
Supplement: bmjopen-2017-019233supp001.pdf [file bmjopen-2017-019233supp001.pdf]

## Supplementary file 1.

*General practice characteristics of data set 2 and of the three general practice groups of dataset 2*

|                                                            | <b>Data set 2 (total)<br/>(n=429)</b> | <b>GP's that did not<br/>register any email-<br/>consultations<br/>(n=211)</b> | <b>GP's that registered a few<br/>(&lt;100)email-consultations<br/>(n=175)</b> | <b>GP's that registered many<br/>(≥100)email-consultations<br/>(n=43)</b> |
|------------------------------------------------------------|---------------------------------------|--------------------------------------------------------------------------------|--------------------------------------------------------------------------------|---------------------------------------------------------------------------|
| Average number of registered patients per general practice | 3752.2 (sd=2387.4)                    | 3371.5 (sd=1735.625)                                                           | 3975.7 (sd=2593.1)                                                             | 4710.8 (sd=3645.1)                                                        |
| n general practice consultations                           | 4 207 538                             | 1 811 720                                                                      | 1 856 205                                                                      | 539 613                                                                   |
| n patients that had a general practice consultation        | 1 177 123                             | 511 947                                                                        | 516 039                                                                        | 149 137                                                                   |
| Level of urbanization                                      |                                       |                                                                                |                                                                                |                                                                           |
| - <i>Very urban</i>                                        | 89 (20.8%)                            | 31 (14.7%)                                                                     | 47 (26.9%)                                                                     | 11 (25.6%)                                                                |
| - <i>High</i>                                              | 96 (22.4%)                            | 40 (19.0%)                                                                     | 42 (24.0%)                                                                     | 14 (32.6%)                                                                |
| - <i>Moderate</i>                                          | 84 (19.6%)                            | 39 (18.5%)                                                                     | 35 (20.0%)                                                                     | 10 (23.3%)                                                                |
| - <i>Little</i>                                            | 85 (19.8%)                            | 54 (25.6%)                                                                     | 27 (15.4%)                                                                     | 4 (9.3%)                                                                  |
| - <i>Not urban</i>                                         | 73 (17.0%)                            | 47 (22.3%)                                                                     | 22 (12.6%)                                                                     | 4 (9.3%)                                                                  |
| - <i>Missing</i>                                           | 2 (0.5%)                              |                                                                                | 2 (1.1%)                                                                       |                                                                           |
| Age of the study population                                | 43.1 (sd=23.5)                        | 43.9 (sd=23.6)                                                                 | 42.4 (sd=23.4)                                                                 | 42.3 (sd=23.0)                                                            |
| Gender (% male) of the study population                    | 532 217 (45.2%)                       | 232 793 (45.5%)                                                                | 232 466 (45.1%)                                                                | 66 958 (44.9%)                                                            |
| NSES of the study population                               | .08 (sd=1.10)                         | .03 (sd=1.02)                                                                  | .05 (sd=1.19)                                                                  | .37 (sd=.98)                                                              |

## Supplementary file 2.

*General practice characteristics of data set 3 and of the three general practice groups of dataset 3 (patients with diabetes)*

|                                                                        | <b>Data set 3 (total)<br/>(n=429)</b> | <b>GPs that did not<br/>register any email-<br/>consultations for<br/>diabetes<br/>(n=351)</b> | <b>GPs that registered a few<br/>(&lt;25) email-consultations<br/>for diabetes<br/>(n=69)</b> | <b>GPs that registered many<br/>(≥25) email-consultations<br/>for diabetes<br/>(n=9)</b> |
|------------------------------------------------------------------------|---------------------------------------|------------------------------------------------------------------------------------------------|-----------------------------------------------------------------------------------------------|------------------------------------------------------------------------------------------|
| Average number of registered patients per general practice             | 3752.2 (sd=2387.4)                    | 3486.7 (sd=1982.2)                                                                             | 4661.5 (sd=3227.4)                                                                            | 7132.6 (4627.6)                                                                          |
| n general practice consultations for diabetes                          | 80 867                                | 59 170                                                                                         | 17 630                                                                                        | 4 067                                                                                    |
| n patients that performed a general practice consultation for diabetes | 37409                                 | 28 397                                                                                         | 7 149                                                                                         | 1 863                                                                                    |
| Level of urbanization                                                  |                                       |                                                                                                |                                                                                               |                                                                                          |
| - <i>Very urban</i>                                                    | 89 (20.8%)                            | 66 (18.8%)                                                                                     | 21 (30.4%)                                                                                    | 2 (22.2%)                                                                                |
| - <i>High</i>                                                          | 96 (22.4%)                            | 74 (21.1%)                                                                                     | 19 (27.5%)                                                                                    | 3 (33.3%)                                                                                |
| - <i>Moderate</i>                                                      | 84 (19.6%)                            | 68 (19.4%)                                                                                     | 15 (21.7%)                                                                                    | 1 (11.1%)                                                                                |
| - <i>Little</i>                                                        | 85 (19.8%)                            | 75 (21.4%)                                                                                     | 9 (13.0%)                                                                                     | 1 (11.1%)                                                                                |
| - <i>Not urban</i>                                                     | 73 (17.0%)                            | 66 (18.8%)                                                                                     | 5 (7.3%)                                                                                      | 2 (22.2%)                                                                                |
| - <i>Missing</i>                                                       | 2 (0.5%)                              | 2 (0.6%)                                                                                       |                                                                                               |                                                                                          |
| Age of the study population                                            | 66.4 (sd=13.7)                        | 66.5 (sd=13.7)                                                                                 | 66.4 (sd=13.77)                                                                               | 64.7 (sd=13.15)                                                                          |
| Gender (% male) of the study population                                | 19 263 (51.5%)                        | 14 640 (51.6%)                                                                                 | 3 583 (50.1%)                                                                                 | 1 040 (55.8%)                                                                            |
| NSES of the study population                                           | -.15 (sd=1.14)                        | -.19 (sd=1.16)                                                                                 | -.16 (sd=1.08)                                                                                | .43 (sd=.73)                                                                             |
